# Supplementary material
Source: publisher figshare collection journal article supplement (https://frontiersin.figshare.com/ndownloader/files/25469654)
Supplement: Supplementary file 1 [file 25469654]

List of tables

Table 1 : Description of the different phenological stages for winter and summer

| **Phenological growth stages** | **Winter (Y-M-D)** | **Summer (Y-M-D)** |
| --- | --- | --- |
| **Planting and first fertilization** | 2019-03-07 | 2019-07-18 |
| **Emergence (>80 %)** | 2019-03-26 | 2019-07-29 |
| **Flowering, second fertilization and Enhancement** | 2019-04-24 | 2019-08-28 |
| **Senescence** | 2019-06-03 | 2019-10-06 |
| **Harvest** | 2019-06-25 | 2019-11-05 |

Table 2. Summary of meteorological and amounts of irrigation water applied during both experiments.

| **Experience**  **2019** | **Relative Humidity (%)** | **Avg. Temp (C)** | **Min. Temp. (C)** | **Max. Temp. (C)** | **Irrigation (liters)** | | | | | | |
| --- | --- | --- | --- | --- | --- | --- | --- | --- | --- | --- | --- |
| **Control** | **S1** | **S3** | **S7** | **Ts1** | **Ts3** | **Ts7** |
| **Winter** | 38.8 | 21.6 | 12.8 | 30.2 | 62.32 | 44.34 | 37.12 | 35.25 | 39.17 | 35.42 | 35.38 |
| **Summer** | 39.1 | 20.4 | 13.2 | 28 | 47.78 | 37.75 | 34.86 | 33.23 | 34.91 | 33.6 | 29.77 |

Table 3. Values used for Cn and Cd in Equation 1 (from ASCE-EWRI (2005))

| Time steps | **Cn** | **Cd** | **Units for ET** | **Units for Rns, Rnl, Rns, G** |
| --- | --- | --- | --- | --- |
| Daytime | 37 | 0.24 | mmh-1 | MJ m-2 h-1 |
| Nighttime | 37 | 0.96 | mmh-1 | MJ m-2 h-1 |

Table 4. Average reduction in the two yield components of stressed plants compared to control plants.

| Treatments | Winter 2019 | | Summer 2019 | |
| --- | --- | --- | --- | --- |
| **Total yield (%)** | **Salable part yield (%)** | **Total yield (%)** | **Salable part yield (%)** |
| **Dry-1D** | 13.65 | 26.36 | 13.32 | 19.42 |
| **Dry-3D** | 23.95 | 42.95 | 35.91 | 39.16 |
| **Dry-7D** | 43.68 | 59.21 | 51.58 | 64.15 |
| **Very-Dry-1D** | 18.77 | 36.68 | 37.05 | 59.56 |
| **Very-Dry-3D** | 41.44 | 57.61 | 57.56 | 76.22 |
| **Very-Dry-7D** | 51.97 | 73.87 | 67.13 | 84.86 |
